# 1    **Quantification of differential transcription factor activity and** 2    **multiomics-based classification into activators and** 3    **repressors: *diffTF***

4    Ivan Berest<sup>1,4\*</sup>, Christian Arnold<sup>1,\*</sup>, Armando Reyes-Palomares<sup>1</sup>, Giovanni Palla<sup>1</sup>, Kasper Dindler  
5    Rasmussen<sup>2,3</sup>, Kristian Helin<sup>2,3</sup> & Judith B. Zaugg<sup>1</sup>

6    <sup>1</sup> Structural and Computational Biology Unit, European Molecular Biology Laboratory, Heidelberg

7    <sup>2</sup> Biotech Research and Innovation Centre (BRIC), University of Copenhagen, Copenhagen

8    <sup>3</sup> Novo Nordisk Foundation Center for Stem Cell Biology, Copenhagen

9    <sup>4</sup> Collaboration for joint PhD degree between EMBL and Heidelberg University, Faculty of  
10    Biosciences

11    \* equal contribution

12    **Transcription factor (TF) activity is an important read-out of cellular signalling pathways**  
13    **and thus to assess regulatory differences across conditions. However, current**  
14    **technologies lack the ability to simultaneously assess activity changes for multiple TFs**  
15    **and in particular to determine whether a specific TF acts globally as transcriptional**  
16    **repressor or activator. To this end, we introduce a widely applicable genome-wide**  
17    **method *diffTF* to assess differential TF activity and to classify TFs as activator or**  
18    **repressor (available at <https://git.embl.de/grp-zaugg/diffTF>). This is done by integrating**  
19    **any type of genome-wide chromatin accessibility data with RNA-Seq data and in-silico**  
20    **predicted TF binding sites. We corroborated the classification of TFs into repressors and**  
21    **activators by three independent analyses based on enrichments of active/repressive**  
22    **chromatin states, correlation of TF activity with gene expression, and activator- and**  
23    **repressor-specific chromatin footprints. To show the power of *diffTF*, we present two**  
24    **case studies: First, we applied *diffTF* in to a large ATAC-Seq/RNA-Seq dataset comparing**  
25    **mutated and unmutated chronic lymphocytic leukemia samples, where we identified**  
26    **dozens of known (40%) and potentially novel (60%) TFs that are differentially active. We**  
27    **were also able to classify almost half of them as either repressor and activator. Second,**

28 **we applied *diffTF* to a small ATAC-Seq/RNA-Seq data set comparing two cell types along**  
29 **the hematopoietic differentiation trajectory (multipotent progenitors – MPP – versus**  
30 **granulocyte-macrophage progenitors – GMP). Here we identified the known drivers of**  
31 **differentiation and found that the majority of the differentially active TFs are**  
32 **transcriptional activators. Overall, *diffTF* was able to recover the known TFs in both case**  
33 **studies, additionally identified TFs that have been less well characterized in the given**  
34 **condition, and provides a classification of the TFs into transcriptional activators and**  
35 **repressors.**

## 36 **INTRODUCTION**

37 Transcription factors (TFs) are important for orchestrating coordinated and dynamic responses  
38 to intra- and extracellular stimuli and regulating a multitude of biological processes. Indeed,  
39 since many signaling cascades end in the activation of a particular set of TFs, observing a  
40 change in overall TF activity can serve as a good read-out of signaling pathways that regulate  
41 them (Kim et al., 2007). Transcriptional regulation is largely influenced by cell type specific  
42 features such as cofactors, cooperative binding partners and local chromatin environment  
43 (Whyte et al., 2013). Adding to this complexity, many TFs can act as transcriptional activators  
44 and repressors depending on the cell type and growth condition (Han et al., 2015, 2018). Thus,  
45 to correctly interpret the downstream effects of a change in abundance of a given TF, it is  
46 important to understand its global mode of action within the specific context of the study.

47 TFs are typically lowly abundant proteins, which makes it difficult to detect them in proteomics  
48 experiments (Kim et al., 2007; Teng et al., 2008), and even if they can be detected, their  
49 abundance and activity do not necessarily correspond since TFs are highly regulated at the  
50 post-translational level. On the other hand, chromatin immunoprecipitation followed by  
51 sequencing (ChIP-Seq), which is the gold-standard technique for measuring genomic TF  
52 binding events, provides information only for one TF at a time and does not detect global  
53 changes in TF activity unless specific experimental normalisation methods are used (e.g.  
54 spike-ins (Bonhoure et al., 2014)). Neither proteomics nor ChIP-Seq experiments can give any  
55 insights into their mode of action. Finally, luciferase assays can measure the activity and mode  
56 of action for a specific TF at a specific location and are therefore fairly low throughput (Komatsu  
57 et al., 2010; Liu et al., 2011). Databases like *TRRUST* (Han et al., 2015, 2018) collect

58 annotations of regulation modes of TFs based on literature text mining and provide a  
59 comprehensive resource for well-studied TF-target interactions. However, for the vast majority of  
60 TFs, there is no consensus about their molecular functional mode of action. A general  
61 framework for determining differential activity of TFs between conditions and classifying TFs into  
62 transcriptional activators and repressors in a cell-type and condition-specific manner is currently  
63 lacking.

64 Towards closing these gaps, we have developed an approach called *diffTF* to estimate global  
65 changes in TF activities across conditions or cell types, and classify TFs into activators and  
66 repressors based on the integration of genome-wide chromatin accessibility or histone mark  
67 ChIP-Seq data with predicted TF binding sites and RNA-Seq data. We corroborated the  
68 classification of TFs into repressors and activators by three independent analyses. First, we  
69 showed that repressors and activators were enriched in repressive and active chromatin states,  
70 respectively. Second, we confirmed that expression levels of repressors were anti-correlated  
71 with their target genes while they were positively correlated with their activators. Third, we  
72 obtained activator- and repressor-specific chromatin footprints based on TFs with a known  
73 mode of action, and found that this agreed very well with the footprints obtained from the factors  
74 as classified by *diffTF*.

75 We applied this approach to two case studies, one comparing two patient cohorts each with a  
76 large number of heterogeneous samples, the second comparing two cell types along a  
77 differentiation trajectory each with a small number of homogeneous samples. For the first study,  
78 we obtained a large ATAC-Seq dataset of chronic lymphocytic leukemia (CLL) samples from  
79 Rendeiro et al. ((Rendeiro et al., 2016)) from > 50 patients and a total of over 1 billion reads and  
80 show that the quantification of differential TF activity by *diffTF* is highly robust with respect to a  
81 wide range of parameter settings. We recapitulate many known TFs associated with CLL and  
82 propose several novel TFs that are involved in processes related to CLL biology such as the  
83 circadian clock. Furthermore, we were able to classify ~40% of these TFs (186) into activators  
84 and repressors, thus reconciling some biological processes that seem driven by activators and  
85 repressors at the same time. For the second case study we performed ATAC- and RNA-Seq on  
86 murine multipotent progenitors (MPP) versus granulocyte-macrophage progenitors (GMP) in  
87 quadruplicate. Again, with *diffTF* we were able to identify the known driver TFs of the

88 differentiation process, and we found that the majority of the highly differentially active TFs are  
89 acting as transcriptional activators.  
90 Finally, the approach has been successfully applied to identify TFs that are specifically  
91 associated with TET2, an enzyme involved in DNA demethylation (Rasmussen et al., 2018), and  
92 to identify novel driving factors in pulmonary artery hypertension (Reyes-Palomares et al., in  
93 preparation).

## 94 RESULTS

### 95 Conceptual derivation of using open chromatin as read-out of differential TF activity

96 We define TF activity as the effect of a TF on the state of chromatin as measured by chromatin  
97 accessibility assays (e.g. ATAC-Seq, DNase-Seq) or ChIP-Seq for active chromatin marks (e.g.  
98 H3K27ac). This definition is based on our earlier work where we showed that genetic variants  
99 affecting H3K27ac signal across individuals (hQTLs) can be explained by disruptions of TF  
100 motifs whenever the hQTL-SNP overlaps with a TFBS (Grubert et al., 2015). Even though the  
101 exact mechanisms of how changes in TF affinity translate to the chromatin level are unknown,  
102 TF activity likely plays a causal role in mediating the effect of the DNA variant onto chromatin  
103 marks (Liu et al., 2015). By reversing this argument, we propose to use the aggregate changes  
104 in chromatin accessibility in the vicinity of putative binding sites of a TF as a read-out for its  
105 change in activity (**Suppl. Fig. 1**). A similar concept has been proposed in other tools that  
106 estimate TF activity based on ATAC or DHS data (Baek et al., 2017); (Schep et al., 2017).

107 Based on this concept, we developed *diffTF*, which is a computational approach to globally  
108 assess differential TF activity between two conditions (basic mode; **Fig. 1a**, **Suppl. Fig. 2**) and  
109 classify TFs into activators and repressors (classification mode, see below; **Fig. 1b**). It is based  
110 on any data that measures active/open chromatin, putative binding sites for TFs of interest , and  
111 optionally, for the classification mode only, matched RNA-Seq data. Briefly, for the basic mode, it  
112 requires *in silico* TFBS that can be obtained using position weight matrices (PWMs) from a  
113 database such as *HOCOMOCO* (Kulakovskiy et al., 2013) and a PWM scanning algorithm such  
114 as *PWMScan* (Ambrosini et al., 2018) for all TFs, or from a database of ChIP-Seq data, such as  
115 *ReMap* (Griffon et al., 2015). For each TFBS it then calculates the difference between two  
116 conditions and summarizes their change in accessibility across all binding sites of a given TF. In  
117 this step it also normalises for the GC content of the respective TFBS (**Suppl. Fig. 3**). The

118 significance is assessed using either an empirical or analytical procedure. The former assesses  
119 the significance of the differential TF activity by comparing the real data against the distribution  
120 of values obtained from permuting the sample labels. The analytical procedure, which is  
121 particularly useful if the number of samples is too low for performing a reasonable number of  
122 permutations, calculates the p-value explicitly based on a t-statistic and estimated variance (see  
123 Methods for details and guidelines and **Suppl. Fig. 4**). In the basic mode, *diffTF* outputs  
124 differential activity and p-value for each TF, which together allow the identification of a set of TFs  
125 that show a significantly higher activity in one of the conditions (**Fig. 1a**).

## 126 **Conceptual derivation of using open chromatin and RNA to classify TFs as** 127 **transcriptional activators and repressors**

128 Surprisingly, little is known about whether a certain TF acts mostly as transcriptional repressor  
129 or activator, and based on literature text mining, most TFs have been annotated multiple times  
130 as both activator and repressor (Han et al., 2018) (**Suppl. Fig. 12b**) (Han et al., 2018) indicates  
131 that the cell type or other external factors are important in determining a TF's main mode of  
132 action. Therefore, we devised a cell-type specific and data-driven, multiomics approach to  
133 classify TFs into activators and repressors within the framework of *diffTF* that can be run on top  
134 of the basic mode (classification mode). Our classification framework is based on the fact that  
135 increasing abundance of an activator TF results in increased transcription of its target genes  
136 (and vice versa for repressors). Yet transcription is difficult to measure since a typical RNA-Seq  
137 experiment measures the steady-state RNA level regulated by transcription and degradation.  
138 We reasoned that measures of chromatin activity (such as accessibility) is a more direct  
139 read-out for the mode of action of TFs. Based on this, we implemented an activator/repressor  
140 classification scheme in *diffTF* using RNA-Seq data as an estimate for TF abundance. For each  
141 TF, we calculate the correlations across individuals between its expression level and the  
142 ATAC-Seq signal in its putative target peak (**Fig. 1b**). Each TF is then classified (i) as an  
143 activator when it shows an overall positive correlation with the ATAC-Seq signal at its putative  
144 target sites, or (ii) as a repressor for an overall negative correlation, or (iii) as undetermined if  
145 the distribution of correlations is not significantly different from the peaks that did not overlap its  
146 putative binding sites (see also Methods and **Suppl. Fig. 12a**). The assumptions underlying this  
147 classification are tested in the context of case-study I (see below).

148

## Case-study I: Quantify differential TF activity in a large ATAC-Seq dataset in CLL

149 We sought to apply *diffTF* to a large ATAC-Seq data set in a biological setting that is  
150 well-studied so that we could assess the technical robustness and its power to recover relevant  
151 biological signal. To do so, we identified a large ATAC-Seq data-set comparing different  
152 subtypes of the extensively studied cancer chronic lymphocytic leukemia (CLL) (Rendeiro et al.,  
153 2016) as an ideal dataset.

154 Chronic lymphocytic leukemia (CLL) is one of the most frequent types of cancer in the Western  
155 world, particularly among the elderly. There are two major subtypes of CLL, which are defined  
156 based on the mutation status of the IgHV locus (mutated: M-CLL and unmutated: U-CLL). In  
157 M-CLL, B-cells go through normal affinity maturation with the aid of T-helper cells and undergo  
158 multiple rounds of IgHV somatic hypermutation to produce high affinity B-cell receptors (BCR).  
159 This process is essential for their development, survival and growth (Neu and Wilson, 2016). In  
160 contrast, U-CLL B-cells reach their affinity maturation point in an unregulated manner, and  
161 without involvement of T-helpers (Chiorazzi and Ferrarini, 2011). Overall, this leads to worse  
162 clinical outcomes such as shorter survival time and higher frequency of relapse after treatment  
163 (Furman et al., 2014).

164 The CLL dataset is comprised of ATAC-Seq data for a cohort of 88 CLL patients stratified by the  
165 mutation status of the IgHV locus (34 U-CLL, 50 M-CLL, 4 unclassified). After data processing  
166 and quality control, 25 and 27 U-CLL and M-CLL samples remained, and we applied *diffTF* in  
167 the basic mode to identify the differences in TF activities between U-CLL and M-CLL (**Suppl.**  
168 **Fig. 5-7**, see Supplementary Methods for more details).

169 In total we identified 67 TFs that are differentially active (FDR < 10%) between the two subtypes  
170 (**Fig. 2a**; **Suppl. Table 1**). About ~41% of the differentially active TFs have previously been  
171 associated with CLL and mostly (90%) agree with the reported condition (i.e., mutated or  
172 unmutated; **Suppl. Table 2**), thus providing a strong biological validation of the approach. The  
173 remaining 59% may represent novel candidate TFs that can advance our understanding of the  
174 disease etiology in general and the biological differences of mutated and unmutated patients in  
175 particular.

176 Before focusing on the biological interpretation of the specific TFs, we used this dataset to  
177 assess the technical robustness of *diffTF* with respect to TF binding site predictions. First, we

178 compared the results of *diffTF* when using putative vs. ChIP-Seq validated TF binding sites  
179 since predicting TF binding sites is inherently noisy and may result in many false positive sites  
180 when compared to ChIP-seq experiments (Landt et al., 2012). We observed a very strong  
181 correlation of the resulting TF activity differences ( $r=0.81$ ; **Fig. 2b**, **Suppl. Fig. 8**), which  
182 indicates that *diffTF* is robust with respect to false positive binding sites. Second, we assessed  
183 the parameters for TF binding site predictions and found that neither the nucleotide composition  
184 of the predicted binding sites for *PWMScan* (**Suppl. Fig. 9**) nor the motif database (*JASPAR* vs.  
185 *HOCOMOCO*) had a strong impact on the differential TF activity ( $r=0.87$ ,  $0.62$  and  $0.69$ ,  
186 respectively, **Fig. 2c-e**). Third, we assessed whether the size of the region surrounding the TF  
187 binding site from where signal was extracted (ranging from just the 7-25 bp long binding site to  
188 additional 600 bp upstream and downstream) had an impact on the results. The resulting  
189 differential TF activities were strongly correlated ( $r>0.9$  for 50-600 bp and  $r=0.76$  for the binding  
190 sites only; see Supplement and **Suppl. Fig. 10**). Additional robustness tests are described in the  
191 supplement.

192 We also assessed the potential of *diffTF* to detect differential TF activities in experiments with  
193 little biological signal. For this, we removed high-signal regions (i.e. differentially accessible  
194 peaks at 5% FDR; see Methods) and compared the resulting differential TF activities to those of  
195 the full set. We found that they were very similar for both sets ( $r=0.89$ ), thus demonstrating the  
196 power of *diffTF* to capture the differential TF activities by summarising the subtle changes in  
197 chromatin accessibility across many TFBS genome-wide (**Fig. 2f**).

198 Finally, we assessed the dependency of *diffTF* results on sample size and sequencing depth.  
199 Intriguingly, we found the results highly congruent across a wide range of sample sizes and  
200 sequencing depths, with the majority of the significant TFs from the full dataset changing in the  
201 same direction in the subsampled data (**Fig. 2g**, **Suppl. Fig. 11**). Generally, the number of  
202 samples appears more important than read depth, and results using the full set were consistent  
203 for a coverage as low as 1-5 million processed reads per sample (see Methods). Although the  
204 subsampling results are dataset-specific and difficult to generalize they provide guidelines for  
205 the applicability of *diffTF* and are in line with single-cell ATAC-Seq data analysis that also show  
206 robustness for low coverage at the level of genome-wide summary statistics (Mezger et al.,  
207 2018).

208 In summary, these results establish the robustness of *diffTF* in quantifying differences of TF  
209 activities, and demonstrate that aggregating signal across all binding sites is a powerful and

210 sensible approach to overcome limitations such as low coverage and little underlying biological  
211 signal.

212

### ***diffTF* proposes many novel TF candidates**

213 We next focused on the biological interpretation of the differentially active TFs (FDR 10%)  
214 between M-CLL and U-CLL patients (**Fig. 2a; Suppl. Table 1**). Since TF binding motifs, which  
215 are the basis of *diffTF* (and any other tool that is based on predicted TF binding sites), can be  
216 very similar between TFs of the same family, we decided to group TFs into TF-motif families  
217 using the PWM clustering tool *Rsat* (Medina-Rivera et al., 2015); clusters available at  
218 <https://bit.ly/2J9TaaK>). The resulting clusters showed overall consistent activity changes within  
219 a TF family (**Fig. 3a**), with the exception of cluster 17 that can be explained by a prominent split  
220 into two branches early in the clustering into NFAT and NFκB factors, which show more activity  
221 in U-CLL and M-CLL, respectively (**Fig. 3c**).

222 The most active TF cluster in U-CLL is the IRF family and STAT2 (cluster 40; **Fig. 3d**), both of  
223 which have been associated with disease onset and progression, and harbour several CLL  
224 susceptibility loci (Arvaniti et al., 2011; Havelange et al., 2011; Slager et al., 2013). It is followed  
225 by the PAX TFs (cluster 54), which affect B-cell to plasma cell differentiation (PAX5), that is  
226 linked with cell survival and poor prognosis in CLL (Ghamlouch et al., 2015). Another prominent  
227 set of regulators are the members of the AP-1 complex (cluster 4), which increase proliferation  
228 and play an important role in driving the invasive nature of U-CLL (Mittal et al., 2013). Finally, we  
229 found c-MYC, which is involved in cell proliferation and differentiation and is highly abundant in  
230 U-CLL (Landau et al., 2015; Yeomans et al., 2016).

231 For M-CLL, we identified TFs that regulate and possibly reduce apoptosis, regulate cell cycle  
232 and suggest normal functionality of B-cells through the classical BCR, NF-κB and Wnt signaling  
233 pathways. The most active TF family in M-CLL patients is that of the POU TFs, also known as  
234 Oct factors (cluster 12; **Fig 3b**), which regulate B-cell development and immunoglobulin  
235 production, therefore promoting survival of the lymphoma cells (Heckman et al., 2006). This is  
236 followed by the ROR factors (cluster 36), which together with Wnt5a activate NF-κB-dependent  
237 survival signaling in CLL (Minami et al., 2010), and the GATA family (cluster 16), which is known  
238 to prime HSCs towards the lymphoid lineage and increase self-renewal of the stem cells in CLL



239 (Kikushige et al., 2011). Other examples include the EGR family, whose motifs are enriched in  
240 aberrantly hypomethylated CpG sites in CLL (Oakes et al., 2016), PPARD, which has recently  
241 been linked to M-CLL through its effect on metabolic pathways in cancer cells (Li et al., 2017),  
242 and members of the GLI family, which are part of the Hedgehog signaling pathway and regulate  
243 apoptosis, thereby supporting survival of M-CLL cells (Kern et al., 2015).

244 Among the novel factors associated with U-CLL, we found several TFs (i.e. BMAL1, CLOCK,  
245 and NR1D1) that are involved in the regulation of the circadian clock, which has recently been  
246 proposed as hallmark of cancer (El-Athman and Relógio, 2018). Moreover, we found members  
247 of the basic helix-loop-helix family, such as BHE40, a regulator of mitotic division (D'Annibale et  
248 al., 2014), which is essential for the development of B1-a cells (Kreslavsky et al., 2017) and  
249 TFAP4, TFE3 and TFEB, for which there are known cases of gene-fusions in renal cell  
250 carcinoma (Kauffman et al., 2014). Another set of novel TFs more active in M-CLL are  
251 associated with pathways relevant for cancer- and B-cells such as escape from apoptosis  
252 (ZN784) (Kasim et al., 2017), regulation of cell cycle progression (ZBTB6) (Chevrier et al.,  
253 2014), and selection of B-cells and promotion of fetal B lymphopoiesis (ARID3A) (Zhou et al.,  
254 2015). The GFI1 family (cluster 35) is less active in U-CLL and their expression and activation  
255 might influence and decrease rates of apoptosis in B-cells (Coscia et al., 2011).

256 In summary, these results show that *diffTF* is able to recapitulate much of the known biology of  
257 the two subtypes of CLL and, in addition, identifies several more factors that are likely to be  
258 implicated in the disease.

## 259 **Determination of the molecular function of TFs: transcriptional repressors and** 260 **activators**

261 The paragraphs above have shown that *diffTF* can identify TFs that alter their activity across  
262 different types of CLL patients. However, to gain mechanistic insights into some of the  
263 regulatory differences between U-CLL and M-CLL, it is crucial to know whether a TF acts as  
264 activator, in which case a higher abundance would generally result in increased transcription of  
265 its target genes, or repressor, in which case an increase in abundance would be accompanied  
266 by decreased target gene transcription (**Fig. 1b**). To do so, we employed the classification mode  
267 of *diffTF*, which integrates the ATAC-Seq data with RNA-Seq to classify TFs as activators or

268 repressors. For this, we first needed to test the global assumption that repressors and activators  
269 have an opposing effect on chromatin accessibility that underlies our classification framework.  
270 For activators, the expectation is that an increased TF abundance will increase the accessibility  
271 at its targets sites. For a repressor, however, the relationship between abundance and  
272 accessibility at its binding site is less straightforward: On the one hand the binding of the factor  
273 itself will increase the accessibility locally, while on the other hand, repression is globally  
274 associated with closed chromatin. To understand the effect of repressors and activators on  
275 chromatin accessibility and derive general principles, we compared the accessibility footprint  
276 (Tn5 insertion sites) of a well-known repressor (REST) and a well-known activator (STAT2) that  
277 are active in our cell type. We observed that for the repressor REST, there is indeed an increase  
278 in accessibility at its motif, which likely reflects the binding of the TF itself. Importantly, however,  
279 the accessibility drops to below the genome-wide average within 10 bp from the center of the  
280 motif (**Fig. 4a, bottom**). In contrast, for the activator STAT2, we observed increased chromatin  
281 accessibility outside its core binding site, which only slowly drops to the genome-wide average  
282 over a distance of >100 bp from the center of the motif, likely representing the effect of the TF  
283 on opening the surrounding chromatin (**Fig. 4a, top**). This shows that, while there is an increase  
284 in accessibility for repressors at the immediate binding site, the surrounding chromatin is highly  
285 compact while it is open for the activator. This is in line with a previous observation on EGR and  
286 SP4 (Baek et al., 2017) and justifies our classification approach implemented in *diffTF*.

287 Applying this reasoning to the CLL dataset, where RNA-Seq data was available for eight  
288 individuals (after QC; see supplement), we were able to classify 44% of the expressed TFs as  
289 either activators or repressors (**Fig 4b-f**; n=186). Among the top activators are the IRFs, which  
290 are well known transcriptional activators (Yanai et al., 2012) and which showed the same  
291 footprint pattern as STAT2 (**Fig. 4e**). Among the top repressors, we found PAX5, which has  
292 been shown to repress the activity of BLIMP-1 (Yasuda et al., 2012) and also shows a footprint  
293 similar to the repressor REST (**Fig. 4b,e**). To assess the binding properties of activators and  
294 repressors globally we performed an unbiased footprinting analysis for all TFs deemed  
295 significant in CLL. Importantly, we found that the aggregate signal across all repressors  
296 produced a footprint similar to that of REST, while the footprint for activators looks similar to  
297 STAT2, again indicating that repressors and activators have very distinct open chromatin  
298 footprints (**Fig. 4f**). Clustering of the footprints of the individual TFs revealed four major classes.  
299 Class I is characterized by low levels of Tn5 insertions in the motif and high levels in the

300 adjacent regions and its members are mainly classified as activators. Class II comprises of TFs  
301 with very low accessibility overall (mainly repressors). Class III contains TFs with high  
302 accessibility at the binding site and low accessibility in the adjacent regions, mainly classified as  
303 repressors but including a few activators. Finally, Class IV comprises TFs with a footprint that  
304 neither resembles an activator nor a repressor (**Suppl. Fig. 13**). This clustering indicates that  
305 TFs with a Class I footprint are likely classified as activators. In contrast, Class III footprints (like  
306 REST) are more likely classified as repressor, even though there might be some activator TFs  
307 that with a similar footprint. Overall, it seems that TF footprints correlate well with the molecular  
308 mode of action of a TF as identified by *diffTF*.

309 When investigating TF families as defined above with the RSAT clusters (**Fig. 3**), we found that  
310 TFs from the same PWM cluster are often classified both as activators and repressors (**Suppl.**  
311 **Fig. 14**), supporting the hypothesis that the molecular function of a TF is highly variable. The  
312 exceptions are cluster 40, containing mainly members of the IRF family, and cluster 17 that  
313 contains both NFAT and NFkB TFs, which are mostly classified as activators. The circadian  
314 regulators provide an example of why it is important to know the mode of action of a particular  
315 TF: When analysing the differential TF activities, it appears as if BMAL1 is more active in M-CLL  
316 while the other two TFs (CLOCK and NR1D1) are more active in U-CLL (**Fig 4d**). However,  
317 since BMAL1 is an activator, while CLOCK and NR1D1 are repressors, all three circadian  
318 factors are consistently more active in M-CLL, albeit with a contrary effect on their target genes.

319 To assess the validity of our repressor/activator classification, we chose three independent  
320 approaches. First, we used *chromHMM* chromatin states for primary B-cells from the  
321 Epigenomic Roadmap (Roadmap Epigenomics Consortium et al., 2015) to assess whether  
322 activators and repressors are preferentially located in active and repressive states, respectively.  
323 Indeed, we observed that the fraction of TFBS in active chromatin states was significantly larger  
324 for activators than for repressors, and vice versa for heterochromatin and repressive states (**Fig.**  
325 **5a**, see also **Suppl. Fig. 15**), thus corroborating our classification of their molecular mode of  
326 action. Second, we assessed whether the direction in gene expression changes of TFs between  
327 U-CLL and M-CLL was in agreement with their differential activity and molecular mode of action.  
328 Again, our observations were in line with our expectations: activators showed a positive  
329 correlation of activity and expression change ( $r=0.19$ ,  $P=0.05$ ) while repressors showed a  
330 negative relationship ( $r=-0.32$ ,  $P=0.0033$ ; **Fig. 5b**). Third, we checked whether the expression of

331 target genes of a given TF changes in the same direction as its activity calculated by *diffTF*,  
332 regardless of the TF's classification as activator or repressor, and again found that this was the  
333 case for both activators and repressors (**Fig. 5c**, see Methods). In summary, these observations  
334 provide three independent lines of evidence that our approach implemented in *diffTF* is able to  
335 classify TFs globally by their mode of action. The fact that the correlations are in the expected  
336 direction but not perfect are likely reflecting that TFs are also regulated on the  
337 post-transcriptional level and thus show the limitation of using gene expression as a proxy for  
338 the abundance of the active form of TFs.

339

### Case study II: Applying *diffTF* to small scale multiomics dataset

340 To assess the applicability of *diffTF* to small datasets, we decided to apply it to the well-studied  
341 mouse hematopoietic system. We generated ATAC-Seq and RNA-Seq profiles of multipotent  
342 progenitor cells (MPP; Lin<sup>-</sup>Kit<sup>+</sup>Sca1<sup>+</sup>; CD150<sup>-</sup>CD48<sup>+</sup>), an early hematopoietic progenitor  
343 population capable of supporting multilineage blood production (Sun et al., 2014), as well as the  
344 more differentiated and myeloid-restricted granulocyte-monocyte progenitors (GMP;  
345 Lin<sup>-</sup>Kit<sup>+</sup>Sca1<sup>+</sup>; CD16/32<sup>+</sup>). The profiles obtained were processed using an in-house ATAC-Seq  
346 pipeline and *diffTF* (using the analytical procedure due to the small number of samples) to  
347 identify TFs that are differentially active between MPP and GMP cells (see Online Methods).  
348 Due to the large number of significant TFs, reflecting the high diversity between the two cell  
349 types, we used RNA-Seq data to filter out non-expressed TFs. The differential signal is  
350 dominated by an increase activity of the members of the well-known class of master regulators  
351 of myelopoiesis, the CEBP family (C/ebp $\alpha$ , $\beta$ , $\delta$ , $\epsilon$ , $\gamma$ ) in GMPs (**Fig. 6a**, **Suppl. Fig. 16**). In  
352 addition, we observed higher activity of the MYC/MYB factors, which are known to be  
353 exclusively active in the GMPs (Baker et al., 2014) and in NFIL3, which is involved in the  
354 generation of natural killer cells (Gascoyne et al., 2009). Conversely, MPPs show a higher  
355 activity for IRF/STAT, ZEB1 and ITF2 (part of the Wnt signaling) as well as TFs from the  
356 Homeodomain (HXB7,HXA10) and Forkhead (FOXO3) families, all of which are associated with  
357 self-renewal of hematopoietic stem cells (Sands et al., 2013).

358 The small number of samples made the correlation-based classification of the TFs into  
359 activators and repressors unreliable. Therefore, we devised a second - less quantitative -  
360 approach for activator/repressor classification that is based on the TF footprint and differential

361 RNA-Seq expression. In short, we determined whether TF activity and expression level co-vary  
362 in the same direction and combined this with visual inspection of the pattern of its footprint  
363 (**Suppl. Fig. 17**). This allowed us to identify the set of activators that showed a clear activating  
364 footprint as observed for the Class I TFs in the CLL data (**Fig. 6b**). Similar to the Class II and III  
365 for CLL, the pattern was less clear for the repressor footprint clusters, which contain both  
366 potential repressors and activators. Interestingly, the most differentially active TFs between MPP  
367 and GMP are mainly classified as activators (CEBPs, NFIL3, IRFs) or have mixed evidence (i.e.  
368 activator footprint, but inconsistent directionality of expression and activity such as DBP and  
369 HLF). The most differentially active repressor we identified is JUN, whose difference in activity is  
370 far below the activators, indicating that the differentiation process from MPP to GMP is mainly  
371 driven by transcriptional activators.

372 Overall, these results show that *diffTF* is able to identify the known TFs that drive the  
373 differentiation from MPP to GMP, thus demonstrating its power to detect signals also for a small  
374 number of samples. Furthermore, we show how a qualitative classification scheme of TFs into  
375 activators and repressors that is primarily based on TF footprints can be useful in comparisons  
376 where the small number of samples does not allow a correlation-based classification.

377

### Comparison with similar tools

378 We compared the few tools with a similar focus (Baek et al., 2017; Heinz et al., 2010; Schep et  
379 al., 2017) with *diffTF* (**Suppl. Table 5**) both qualitatively (*chromVAR*, *BagFoot*, *HOMER*) and  
380 quantitatively (*HOMER* and *chromVAR*). Overall, *diffTF* provides a more flexible and tailored  
381 analysis framework due to the extensive choice of parameters, diagnostic plots, TFBS-specific  
382 results, visualizations, and pipeline adjustability. As mentioned above, it is unique in its ability to  
383 directly integrate RNA-Seq with ATAC-Seq data to classify TFs into activators and repressors.  
384 Due to its flexibility, *diffTF* is computationally expensive, and we provide detailed instructions on  
385 memory and time requirements in the documentation.

386 We first compared *diffTF* with a more traditional TF motif analysis such as *HOMER* (Heinz et al.,  
387 2010), which looks at motif enrichment in a set of differentially accessible peaks. Strikingly, no  
388 enriched motifs were found in M-CLL with *HOMER*, while the few discovered in U-CLL  
389 correlated significantly with differential TF activity as computed by *diffTF* (**Suppl. Fig. 18**, see

390 Methods). This analysis highlights the power of *diffTF* to capture more signal than standard  
391 motif enrichment approaches.

392 To compare *diffTF* with an approach that is also based on TF activities we chose *chromVAR* and  
393 *BaGFoot* (Baek et al., 2017). We were unfortunately unable to run and adopt the BagFoot  
394 workflow for our CLL data due to missing example files, an incomplete documentation and  
395 unresponsiveness from the authors. For *chromVAR*, the results correlate very well overall, with  
396 correlation coefficients between 0.75 and 0.93 (Pearson) and 0.69-0.88 (Spearman), depending  
397 on the set of TFs (i.e., all TFs or only those deemed significant by *diffTF*, therefore  
398 predominantly removing TFs with low signal) and whether *chromVAR* deviations or deviation  
399 scores are compared against (**Suppl. Fig. 19a-b**, see Methods). Differences likely arise due to  
400 distinct methodological divergences such as comparing fold-changes for peaks (*chromVAR*) vs.  
401 binding sites (*diffTF*) or whether to compare the TF-specific effect against the mean effect  
402 across all TFs (*diffTF*) or not (*chromVAR*; see also Methods and **Suppl. Fig. 19c-f**). However,  
403 *diffTF* goes one step beyond the currently available methods by classifying TFs based on their  
404 mode of regulation - activator or repressor, thus providing important additional insights into their  
405 molecular function.

## 406 DISCUSSION

407 We presented a genome-wide method for quantifying differences in differential TF activity for a  
408 large set of TFs simultaneously, and for classifying them into their molecular mode of action as  
409 transcriptional activators or repressors. The method is available for download at  
410 <https://git.embl.de/grp-zaugg/diffTF> along with a comprehensive documentation and example  
411 data.

412 We have shown in two case studies that *diffTF* is able to recover a change in activity for the TFs  
413 expected to drive the biological processes, thus demonstrating the biological validity of the  
414 method. In addition, we have extensively tested and demonstrated the technical robustness of  
415 *diffTF*. In particular, we have shown that *diffTF* is able to overcome the inherent noisiness of TF  
416 binding site predictions by aggregating data across all putative binding sites.

417 Calculating differential TF activity based on aggregating signal across the genome has been  
418 proposed before based on the expression of putative target genes of a certain TF (Boorsma et  
419 al., 2008; Bussemaker et al., 2001). Using the effect on chromatin instead of expression has  
420 several advantages: first chromatin is a much simpler trait since gene expression is the sum of  
421 transcription and degradation, thus increasing the power to detect differences. Second, there  
422 are much more peaks than genes, thus allowing for better statistics and signal to noise ratio.  
423 Finally, the effect on chromatin is much more local than on gene expression – in particular in  
424 mammalian genomes, where genes can be regulated by distal enhancers. We have compared  
425 differential TF activity calculated based on the average expression change of the target genes to  
426 the output of *diffTF* and found that while the direction of activity between both methods is highly  
427 correlated, the signal is much lower when using the expression of target genes instead of  
428 chromatin accessibility at putative binding sites.

429 To demonstrate the power of *diffTF* for large but heterogeneous datasets, we have applied it to  
430 identify and characterise differences between M-CLL and U-CLL from a publicly available  
431 dataset of ATAC-Seq (1bn reads, 52 patients) and RNA-Seq. It is noteworthy that a TF motif  
432 enrichment analysis on the significantly differentially accessible peaks did not reveal any factor  
433 to be significantly enriched in M-CLL, indicating that in this case (as probably in many  
434 patient-control studies) the key TFs are not necessarily switching their target enhancers and  
435 promoters on and off, but rather mis-regulating many regions to a lesser extent. The advantage  
436 of *diffTF* is that it can detect a slight shift in activity of the TF even if the signal differences at  
437 each binding site are very low and rarely significant. It does so by averaging across all of a TFs  
438 putative binding sites and is therefore more powerful than conventional enrichment analyses.

439 We have devised an approach within the *diffTF* framework to classify TFs into activators and  
440 repressors based on the correlation of their expression level (RNA-Seq) and the activity of their  
441 putative binding sites (ATAC-Seq). This information is highly relevant when interpreting the  
442 action of TFs since it is important to know whether an upregulation of a TF would have a  
443 positive or negative effect on chromatin (and therefore transcriptional) activity. Notably, this  
444 classification could work even for datasets for which insufficient RNA-Seq data are available –  
445 as we have shown for the MPP-GMP case – by jointly investigating TF footprints, differential  
446 expression of the TF and differential TF activity.

447 It is important to note that TFs can often act as activators and repressors at different genomic  
448 loci e.g. depending on their cofactors, whereas here we predict their main mode of action based  
449 on the mean effect across all their predicted binding sites, and thereby lose any information  
450 about bifunctionality. Furthermore, since the classification is based on correlations, it is heavily  
451 dependent on variation in the RNA-Seq signal across individuals, thus biasing the TFs that can  
452 be classified towards those that are variable across individuals. As a consequence, TFs whose  
453 post-transcriptional regulation is not reflected in their transcript abundance will not get classified  
454 correctly. Another potential misclassification may happen because of the similarity of PWMs  
455 within a cluster, which makes it difficult to distinguish the exact effect of one TF while its  
456 expression level is uniquely defined. As an example we cite PRDM1, which is part of IRF family  
457 (cluster 40) and classified as very strong repressor, its footprint however looks more similar to a  
458 typical activator (data not shown), suggesting that it is not PRDM1 driving the ATAC-Seq signal  
459 in this case, but the IRFs. Thus, for distinguishing the functional roles of TFs from the same  
460 cluster/family further biochemical experiments will be needed. Despite these potential pitfalls,  
461 *diffTF* provides unique insights into the molecular mechanism of TFs on a global level.

462 Since many ATAC-seq experiments have a rather low number of samples, we also assessed the  
463 power of *diffTF* to uncover biology in small (but more controlled) experiments. In particular, we  
464 have performed a *diffTF* analysis to compare murine MPP and GMP (4 replicates each). Again  
465 we identified the major TFs driving the differentiation, and were able to qualitatively classify TFs  
466 into activators and repressors - in a correlation-independent approach. This classification  
467 revealed that the bulk of the change in chromatin accessibility during the differentiation from  
468 MPP to GMP is driven by activators. This case-study demonstrates the applicability of *diffTF* to  
469 small-scale data.

470 While similar methods have been proposed for analysing ATAC-Seq data (Baek et al., 2017;  
471 Schep et al., 2017), our method has several advantages when dealing with bulk ATAC-Seq data  
472 and can also be used for histone mark ChIP-Seq data: (i) Unlike other methods that calculate  
473 the background theoretically based on the genome-wide read depth, *diffTF* is insensitive to  
474 sequence and locus dependent biases since we calculate a fold-change between conditions for  
475 each region, thus normalizing for local read depth biases. This is particularly advantageous for  
476 detecting small changes such as between two heterogeneous cohorts in patient-control studies.  
477 (ii) *diffTF* allows integration with matching RNA-Seq data to classify TFs into activators and



478 repressors in a fully data-driven approach within the same analysis framework. Such  
479 classifications are a significant help when interpreting the effects of up/down regulation of a  
480 particular factors. (iii) *diffTF* provides the fold-change value for each TFBS which allows for easy  
481 retrospective follow-up analysis, e.g. identifying the most differential regions regulated by a  
482 specific set of TFs. (iv) Finally, our method might allow to analyse time-course data in an  
483 additive manner by calculating the overall change of slope for each TF (see Methods).

484 Overall, with *diffTF* we present a multiomics data integration strategy of ATAC-Seq and  
485 RNA-Seq data that calculates differential TF activity across conditions and classifies TFs based  
486 on their molecular mode of action into activators and repressors. With this, *diffTF* can aid in  
487 formulating testable hypotheses and ultimately improve the understanding of regulatory  
488 mechanisms that are driving the differences in cell state on a systems-wide scale.

## 489 **METHODS**

490 Methods, including statements of data availability and any associated accession codes and  
491 references, are available in the online version of the paper.

## 492 **ACKNOWLEDGMENTS**

493 We thank Bernd Klaus for help with the statistical part and EMBL for funding. A.R.P is recipient  
494 of a postdoctoral fellowship granted by Fundación Ramón Areces. G.P. was supported by the  
495 Otto Bayer Scholarship from Bayer Foundations.

## 496 **AUTHOR CONTRIBUTIONS**

497 J.Z. and I.B. conceived the study, C.A. and I.B. developed the computational framework and  
498 performed the analyses, A.R.P. and G.P. contributed to the development and analysis, K.D.R.  
499 performed the experiments, K.H. supervised the experiments, J.Z. supervised the study and  
500 C.A., I.B., and J.Z. wrote the manuscript.

## 501 **COMPETING FINANCIAL INTERESTS**

502 The authors declare no competing financial interests.

503 **Figures and figure captions**

504 **Figure 1.** *Schematic representation of the diffTF workflow. (a)* A simplified workflow illustrates  
505 the principle upon which *diffTF* is based: it calculates a fold-change between two conditions for  
506 each binding site of a given TF and compares this distribution to a background set of  
507 fold-changes obtained from GC-content matched loci that do not contain the putative TFBS. The  
508 difference in distribution is assessed in significance and effect size and visualized in a volcano  
509 plot where the y-axis indicates statistical significance and the x-axis shows the effect size. (For a  
510 detailed workflow see **Suppl. Fig. 1** and **2**). **(b)** *Schematic representation of the classification*  
511 *approach:* correlation of TF expression level with the accessibility of its target sites. If the  
512 distribution of correlations between a TF's RNA-level and the chromatin accessibility at its target  
513 sites is more positive than the background distribution (accessibility at non-target sites), the TF  
514 is classified as an activator in the particular biological environment; if negative, it is classified as  
515 a repressor. Correlations close to 0 are classified as undetermined.

A Schematic representation of *diffTF* - basic mode

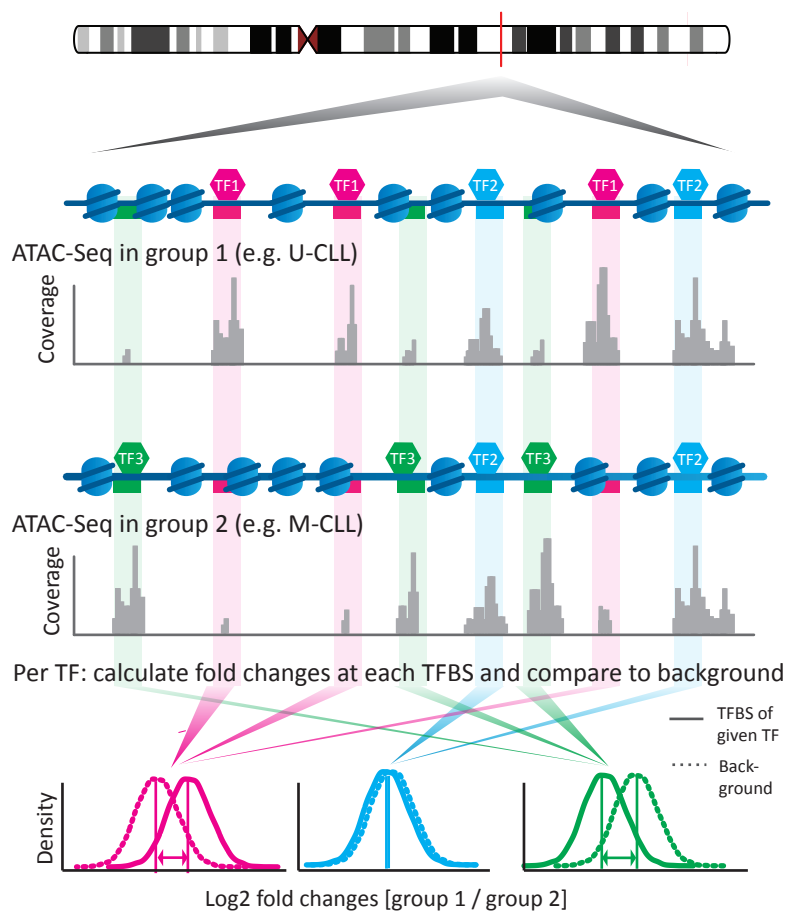

B Schematic representation of *diffTF* - classification mode

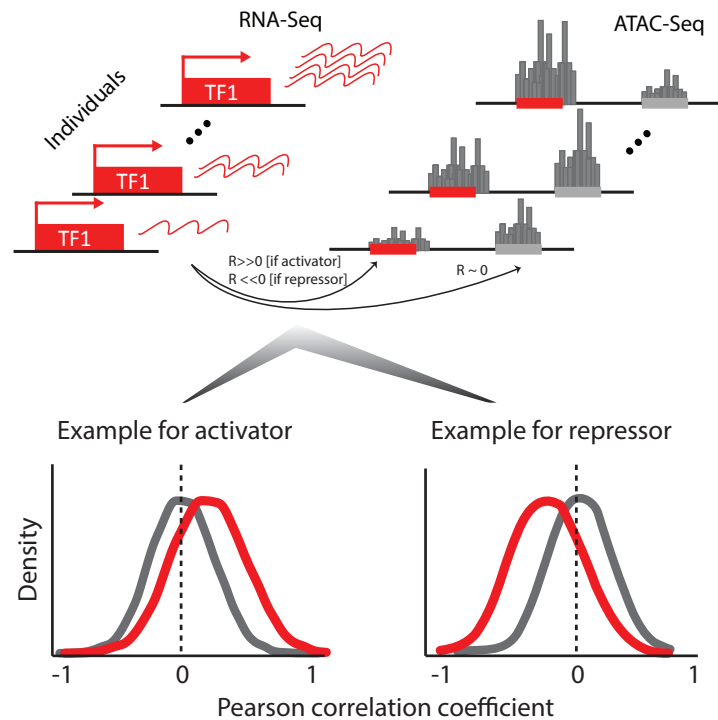

516 **Figure 2.** *diffTF* results for the CLL dataset, experimental validation and technical robustness  
517 of the method. **(a)** Volcano plot of differential TF activity between U-CLL (n=27) and M-CLL  
518 (n=25) patients. The y-axis denotes statistical significance (-log<sub>10</sub> transformed). TFs that pass  
519 the significance threshold (5% FDR; dotted line) are labeled and colored according to their  
520 novelty status (see text and **Suppl. Table. 2**). “#TFBS” denotes the number of predicted TF  
521 binding sites in the peak regions for this analysis. (b)-(f): Technical robustness of *diffTF*.  
522 Scatterplots of the differential TF activity from all TFs for two different *diffTF* analyses are  
523 shown. Each point represents one TF. For (c-f), colors represent significance at 5% FDR (white  
524 – not significant in either analysis; light green and light blue – significant for the analysis on the  
525 x-axis or y-axis, respectively; purple – significant for both analyses). **(b)** Comparison of all  
526 predicted TFBS and TFBS experimentally validated by ChIP-Seq data from ReMap. See also  
527 **Suppl. Fig. 8.** **(c-d)** Comparison for different p-value thresholds in *PWMScan* to predict TFBS:  
528 (c) standard vs. stringent (i.e., 1e-5 vs. 1e-6) and (d) standard vs. lenient (i.e., 1e-5 vs. 5e-5) for  
529 a total of 628 TFs for which binding sites were retrieved for both scanning modes. **(e)**  
530 Comparison of *diffTF* results based on *HOCOMOCO* v10 vs. *JASPAR* 2018 as input for the 412  
531 TFs for which a motif was available in both databases. **(f)** Comparison of the full consensus  
532 peak set (*allPeaks*) and only the non-differentially accessible peaks (*noDApeaks*; n=640 TFs  
533 from *HOCOMOCO*). **(g)** Robustness analysis based on sequencing depth and sample size.  
534 Each cell in the heatmap shows the fraction of TFs that showed the same direction of change as  
535 in the full dataset for varying degrees of down-sampling sequencing depth and number of  
536 samples, (5% FDR), averaged over 50 independent repetitions to minimize sampling noise.  
537 Only TFs that were deemed significant in the full dataset are considered (see also **Suppl. Fig.**  
538 **11**). Sequencing depth is shown as a fraction of the original data and median number of reads  
539 across samples, while the number of samples is given as unmutated + mutated.

**A**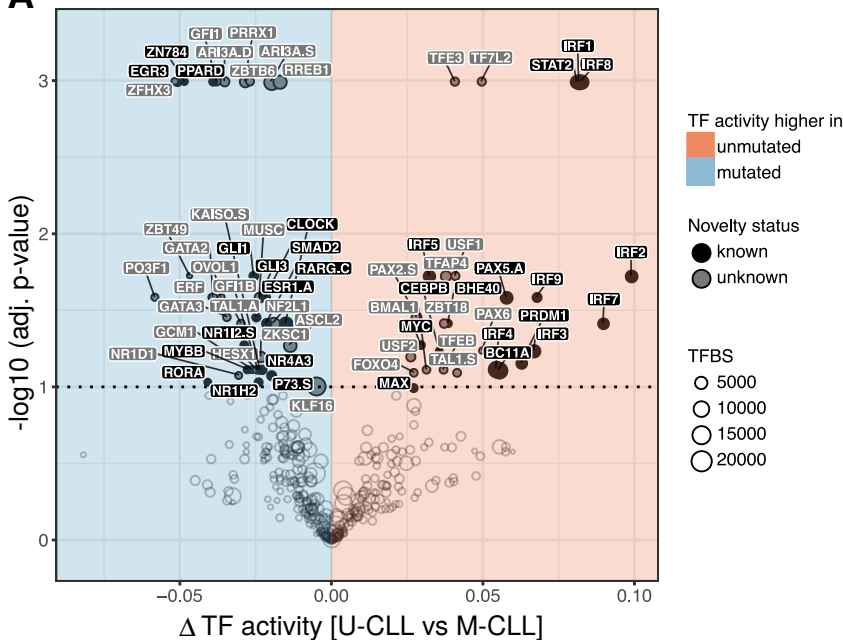**B**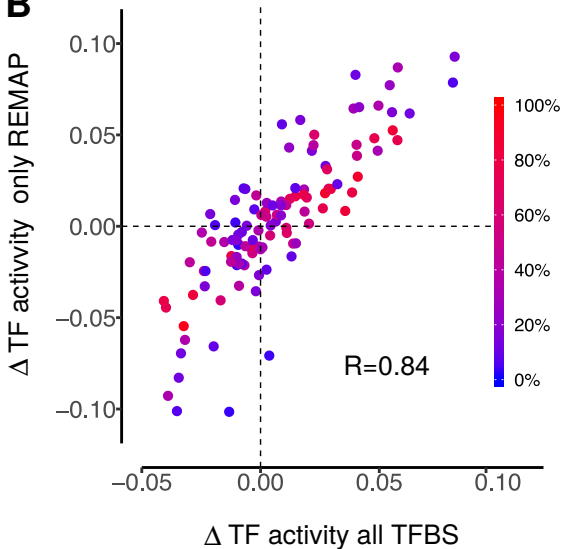**C**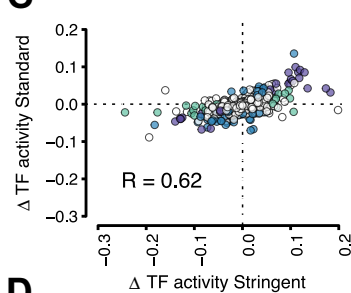**D**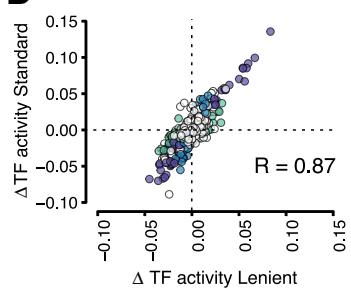**E**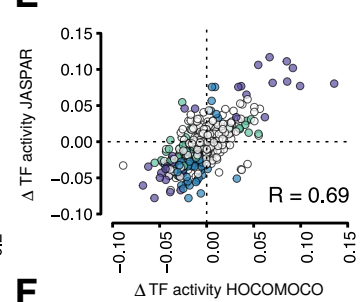**F**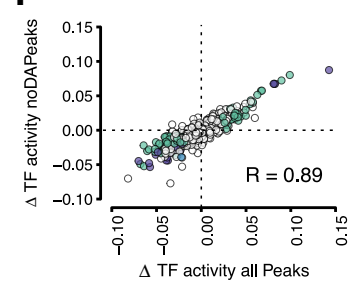

Significance 5% FDR: ○ 1 ● 2 ● 3 ● 4

**G**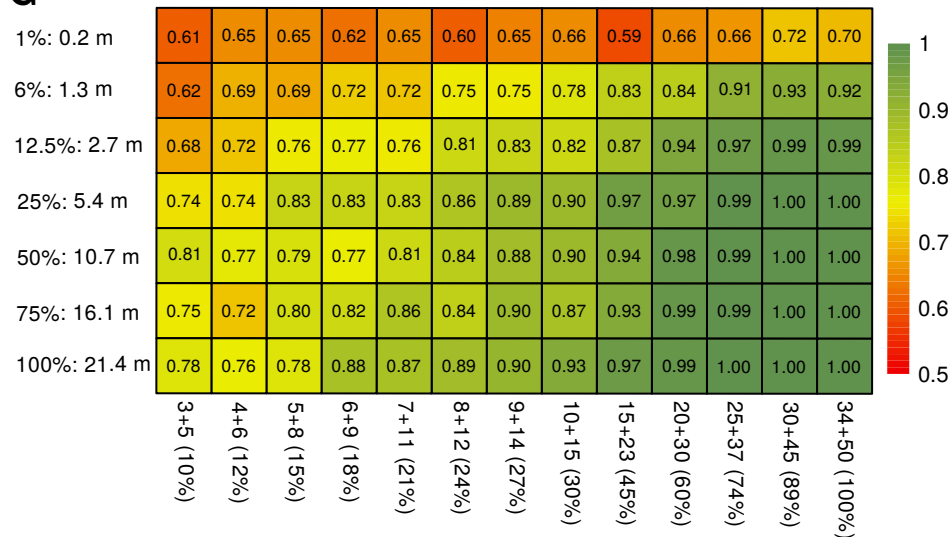

540 **Figure 3.** *Clustering of TFs based on the similarity of their PWMs.* **(a)** Boxplot of PWM clusters  
541 with at least 3 members as defined by RSAT for the differential TF activity between U-CLL and  
542 M-CLL. In each cluster, the most negative and most positive TF is labeled. **(b)-(d):** RSAT  
543 clustering output and tree for specific clusters. **(b)** Cluster 12 (POU family), the most distinct  
544 cluster for M-CLL patients. **(c)** Cluster 17, which has two distinct subclusters, representing the  
545 NFAT and NFkB family, respectively. **(d)** Cluster 40 (IRF family), the most distinct cluster for  
546 U-CLL patients.

**A**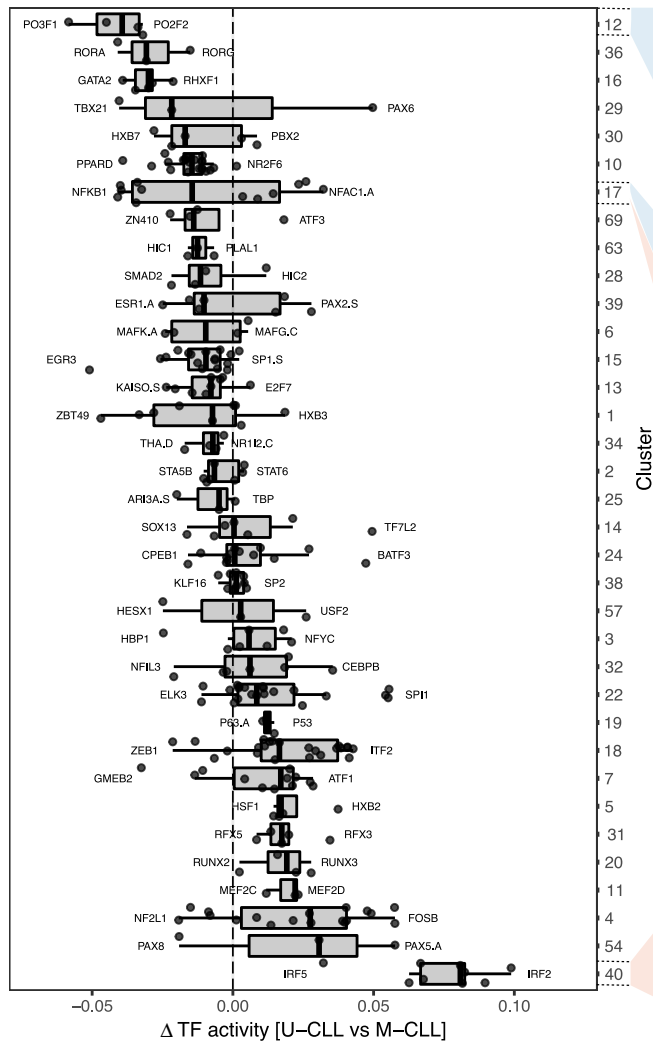**B**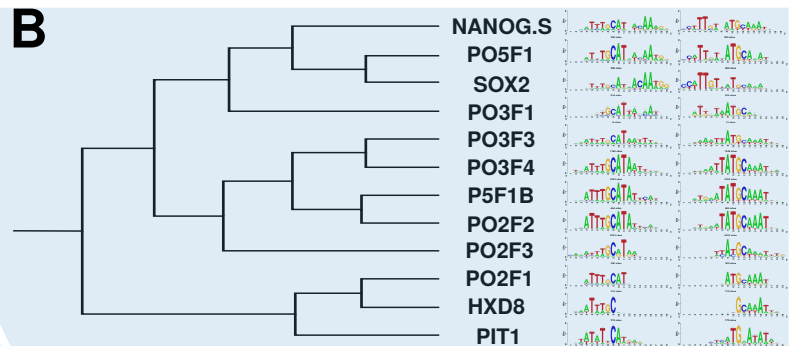**C**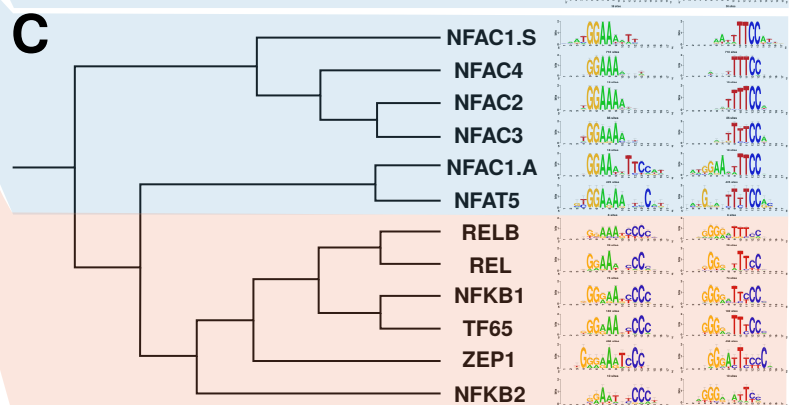**D**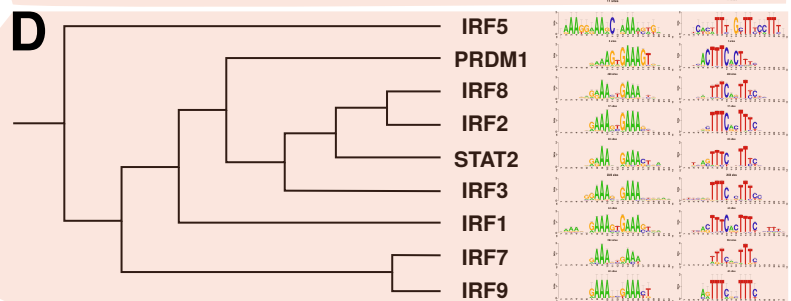

547 **Figure 4.** *Classification of TFs into activator or repressor based on RNA-Seq and ATAC-Seq*  
548 *data.* **(a)** Exemplary footprints for a well-known activator (STAT2, top) and repressor (REST,  
549 bottom). The x-axis depicts the distance in bp from the TFBS center, the y-axis denotes the  
550 number of average Tn5 insertions, normalised to the library size and numbers of samples  
551 across U-CLL and M-CLL. TFBS were predicted by *PWMscan* and only those overlapping with  
552 open chromatin have been considered. The solid black line indicates the average insertion sites  
553 within accessible chromatin. **(b)** Distributions of the Pearson correlations between TF  
554 expression and ATAC-Seq signal at all putative TFBS (red line), and background distribution of  
555 TFBS not containing the motif of interest (grey line) for two specific TFs, IRF2 (top) and PAX5  
556 (bottom). **(c)** Summary of (b) across all TFs in the form of a heatmap showing the differences in  
557 Pearson correlation of putative target peaks and background for each TF (i.e., subtracting the  
558 black from the red line in (b)). Each TF is one row and is annotated as activator (green),  
559 undetermined (grey) or repressor (red) as classified by *diffTF*. **(d)** Same as Fig. 2a, but with the  
560 TFs labeled with their predicted role as activator (green), undetermined (black) or repressor  
561 (red). See Fig. 2a for details. **(e)** Footprint analysis for an activator (IRF2, right) and repressor  
562 (PAX5.A, left) as classified by *diffTF*. The top row shows the footprints separately for M-CLL and  
563 U-CLL (blue and orange, respectively) based on the normalized number of Tn5 insertions, while  
564 the bottom row highlights their differences (U-CLL - M-CLL) are shown. See (a) for axis  
565 descriptions. **(f)** Summary footprint for all activators (top, green) and repressors (bottom, red).  
566 See (a) for axis descriptions.



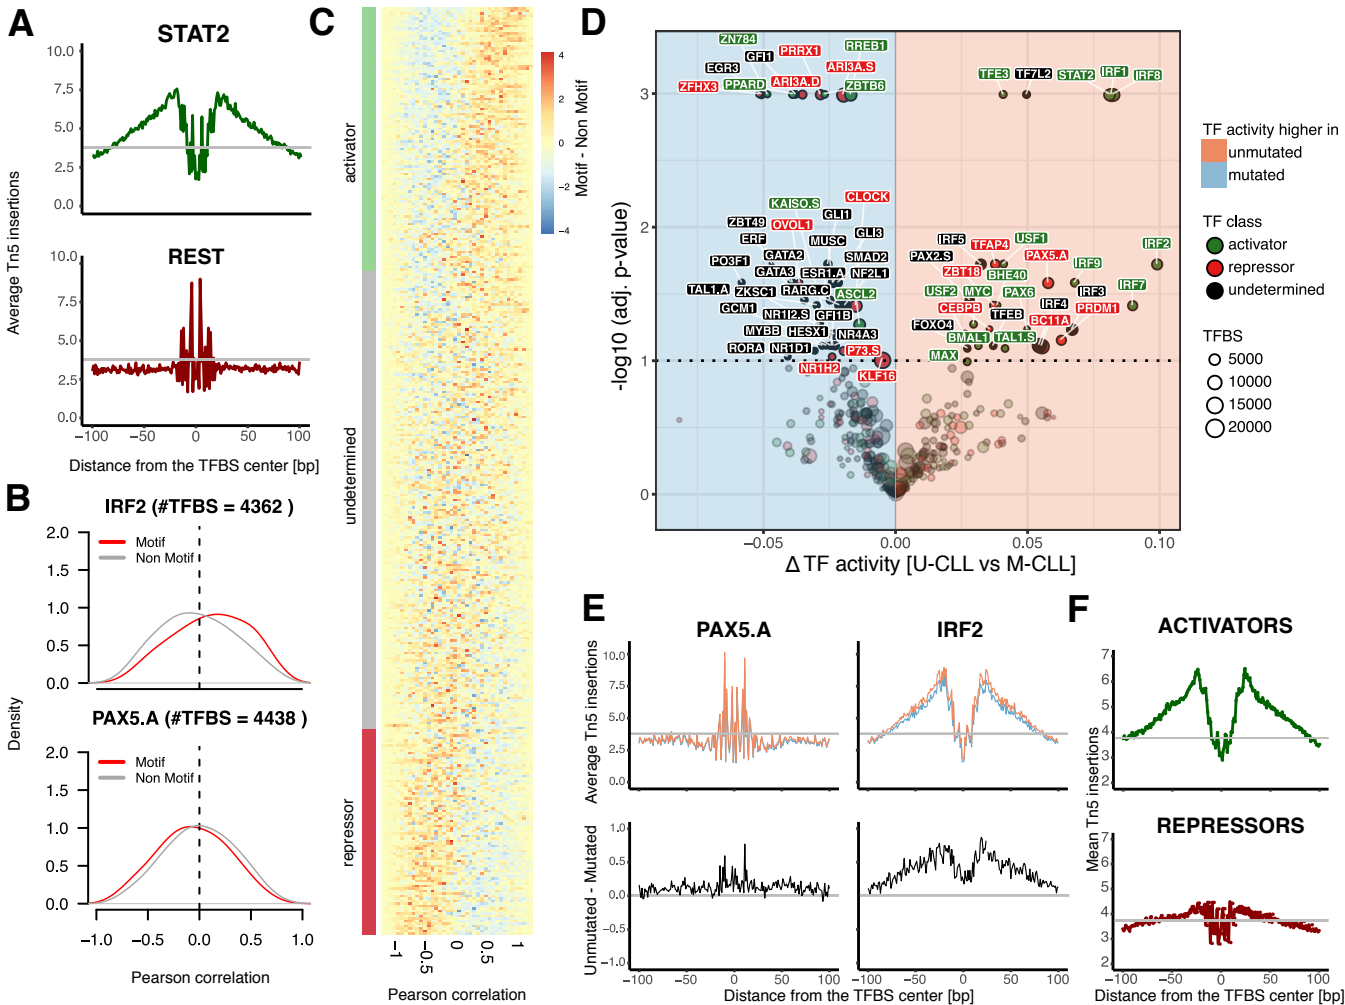

567 **Figure 5. Validations for the activator and repressor classification and downstream analyses. (a)**  
568 Boxplots showing the fraction TFBS overlapping with specific chromatin states as defined by  
569 *chromHMM* (Roadmap Epigenomics Consortium et al., 2015) for all activators (green) and  
570 repressors (red) are shown. Only *chromHMM* states with significant differences (Wilcoxon test;  
571 p-value < 0.05) between activators and repressors are displayed. **(b)** Pearson correlation of the  
572 log<sub>2</sub> fold changes from RNA-Seq and differential TF activity for activators (green, left),  
573 undetermined TFs (black, middle), and repressors (red, right). Only expressed TFs are shown.  
574 **(c)** Correlation of differential TF activity and median of the differential target gene expression of  
575 U-CLL against M-CLL. The x-axis shows the median target gene (TG) log<sub>2</sub> fold-change, the  
576 y-axis denotes the differential TF activity. Each TF label is colored based on its  
577 activator/repressor status (green/red) on a continuous scale (dark to light) based on the  
578 correlation strength (see Fig. 4d). (OR=odds ratio, r=Pearson correlation coefficient).

**ACTIVE CHROMATIN STATES**

**REPRESSIVE CHROMATIN STATES**

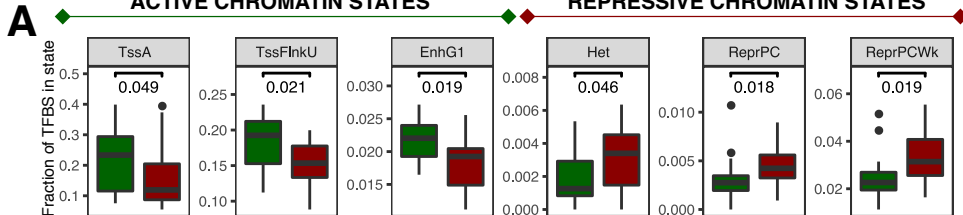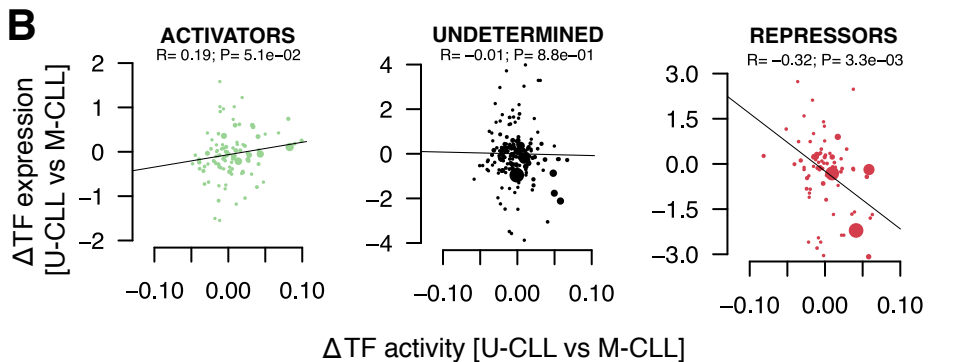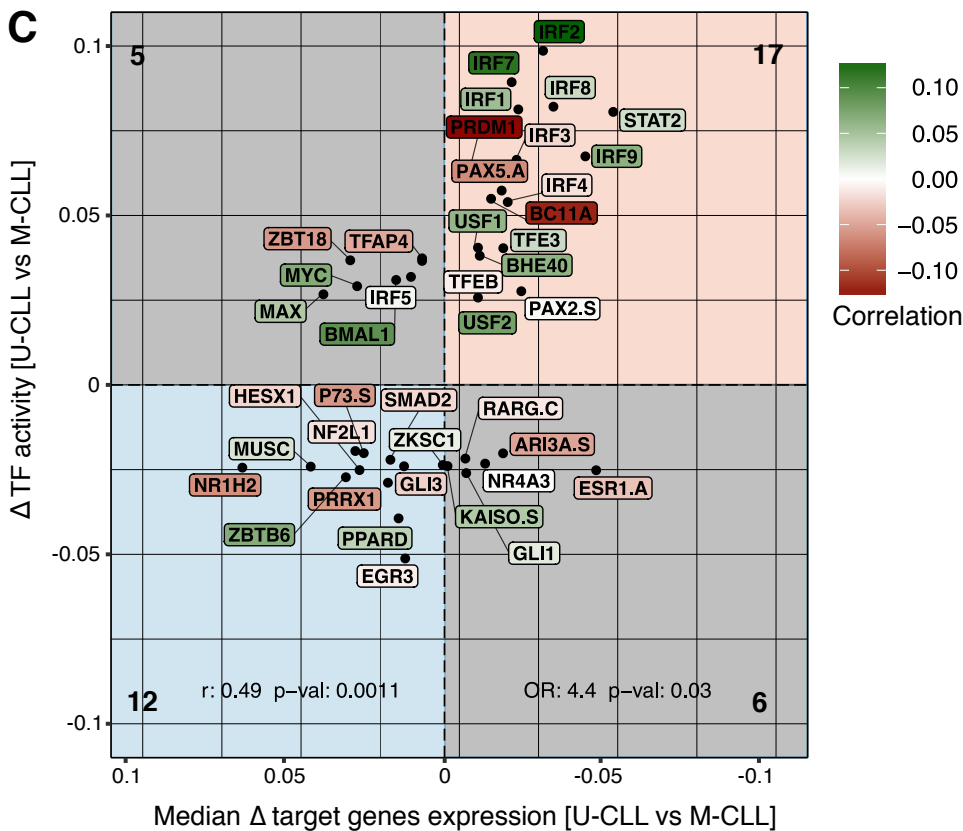

579 **Figure 6.** *diffTF* recapitulates known TFs that drive the differentiation from MPP to GMP and  
580 shows a similar activator/repressor cluster as in the CLL data. **(a)** Volcano plot of differential TF  
581 activity between MPP (n=4) and GMP (n=4) cells. Due to the high number of significant TFs  
582 only the most significant are labeled. The full list is available in Suppl. Table 4. **(b)** The footprints  
583 are for TFs in two selected clusters that represent the activators and repressors, respectively  
584 are shown as heatmap (right) and aggregate plots (left; see **Suppl. Fig. 17** for the full heatmap).  
585 Only TFs that were significantly differentially active and all significantly differentially expressed  
586 (adj. p-value < 0.05 for both) are displayed. Colors represent footprint strength, while white  
587 denotes the value of the genomic background in the consensus peakset. Clusters were defined  
588 using hierarchical clustering with the *ward.D2* method (clustering tree omitted for clarity)(see  
589 **Suppl. Fig. 17**). For the cluster summary footprints at the left, we divided each footprint value by  
590 the mean value of each cluster to highlight the differences in the surrounding chromatin  
591 structure. The direction of TF expression and TF activity is in analogy to what is described in the  
592 text. “Direction” denotes whether expression and TF activity have the same or opposite sign.

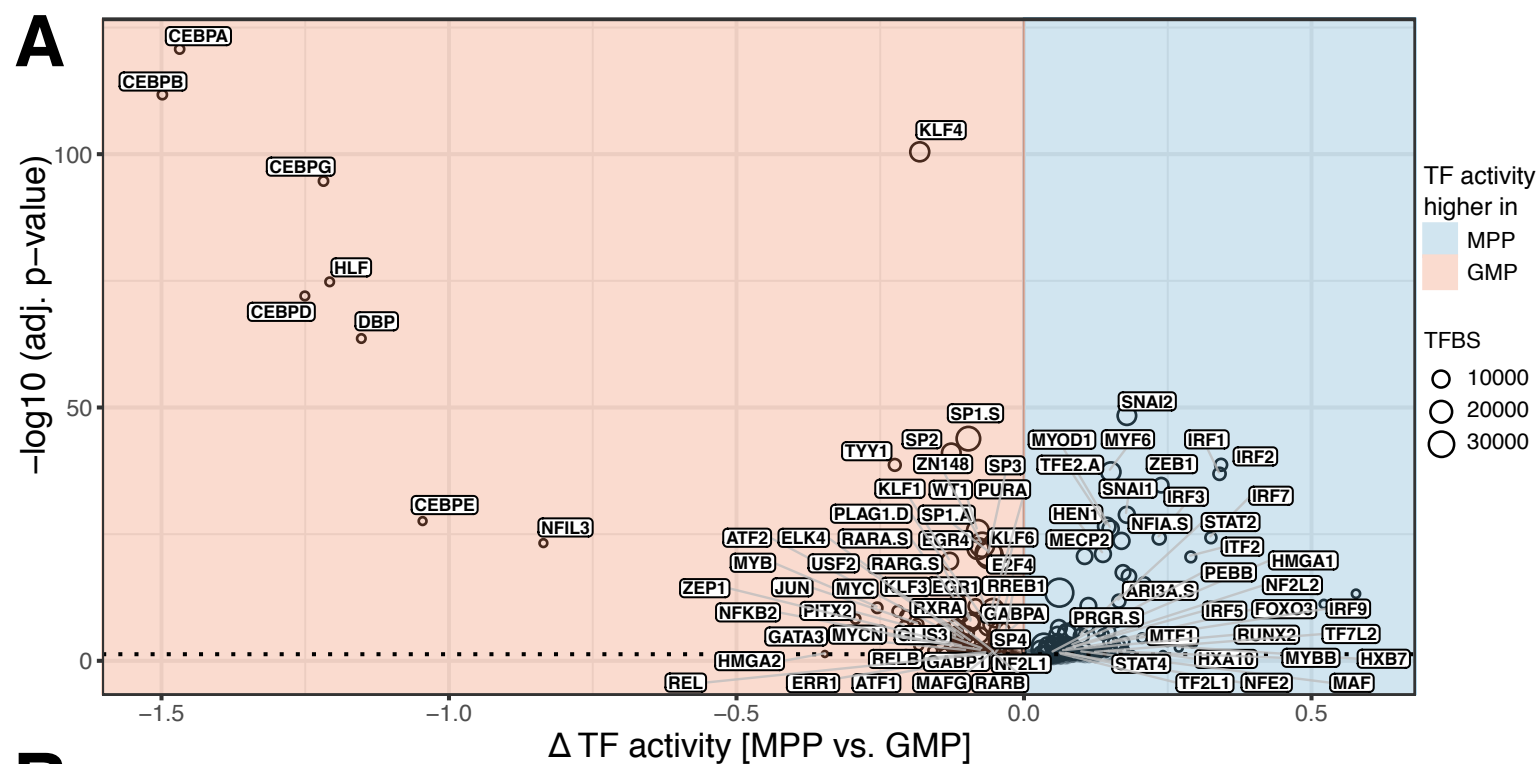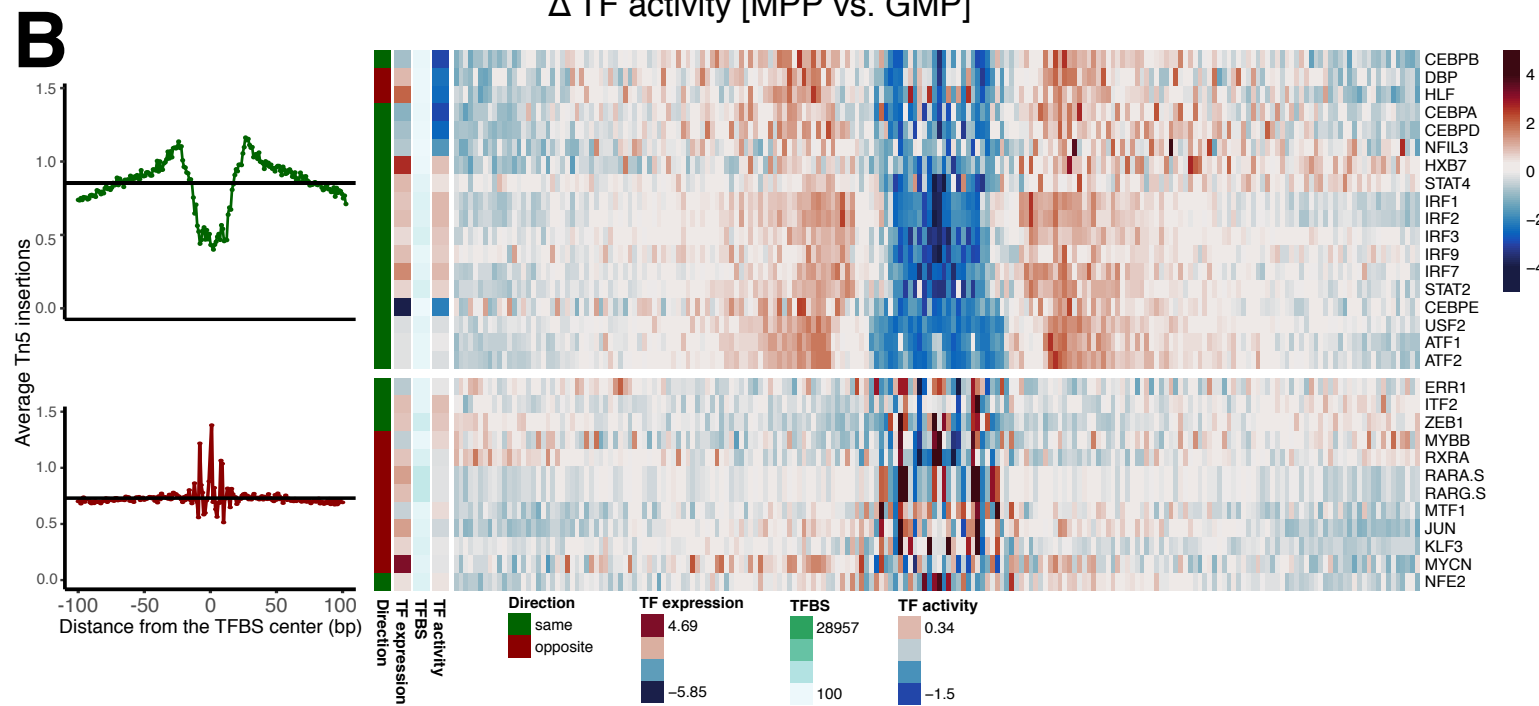

593 **REFERENCES**

- 594 Ambrosini, G., Groux, R., and Bucher, P. (2018). PWMScan: a fast tool for scanning entire  
595 genomes with a position-specific weight matrix. *Bioinformatics* *34*, 2483–2484.
- 596 Arvaniti, E., Ntoufa, S., Papakonstantinou, N., Touloumenidou, T., Laoutaris, N.,  
597 Anagnostopoulos, A., Lamnissou, K., Caligaris-Cappio, F., Stamatopoulos, K., Ghia, P., et al.  
598 (2011). Toll-like receptor signaling pathway in chronic lymphocytic leukemia: distinct gene  
599 expression profiles of potential pathogenic significance in specific subsets of patients.  
600 *Haematologica* *96*, 1644–1652.
- 601 Baek, S., Goldstein, I., and Hager, G.L. (2017). Bivariate genomic footprinting detects changes  
602 in transcription factor activity. *Cell Rep.* *19*, 1710–1722.
- 603 Baker, S.J., Ma'ayan, A., Lieu, Y.K., John, P., Reddy, M.V.R., Chen, E.Y., Duan, Q., Snoeck,  
604 H.-W., and Reddy, E.P. (2014). B-myb is an essential regulator of hematopoietic stem cell and  
605 myeloid progenitor cell development. *Proc Natl Acad Sci USA* *111*, 3122–3127.
- 606 Bonhoure, N., Bounova, G., Bernasconi, D., Praz, V., Lammers, F., Canella, D., Willis, I.M., Herr,  
607 W., Hernandez, N., Delorenzi, M., et al. (2014). Quantifying ChIP-seq data: a spiking method  
608 providing an internal reference for sample-to-sample normalization. *Genome Res.* *24*,  
609 1157–1168.
- 610 Boorsma, A., Lu, X.-J., Zakrzewska, A., Klis, F.M., and Bussemaker, H.J. (2008). Inferring  
611 condition-specific modulation of transcription factor activity in yeast through regulon-based  
612 analysis of genomewide expression. *PLoS ONE* *3*, e3112.
- 613 Bussemaker, H.J., Li, H., and Siggia, E.D. (2001). Regulatory element detection using  
614 correlation with expression. *Nat. Genet.* *27*, 167–171.
- 615 Chevrier, S., Emslie, D., Shi, W., Kratina, T., Wellard, C., Karnowski, A., Erikci, E., Smyth, G.K.,  
616 Chowdhury, K., Tarlinton, D., et al. (2014). The BTB-ZF transcription factor Zbtb20 is driven by  
617 Irf4 to promote plasma cell differentiation and longevity. *J. Exp. Med.* *211*, 827–840.
- 618 Chiorazzi, N., and Ferrarini, M. (2011). Cellular origin(s) of chronic lymphocytic leukemia:  
619 cautionary notes and additional considerations and possibilities. *Blood* *117*, 1781–1791.
- 620 Coscia, M., Pantaleoni, F., Riganti, C., Vitale, C., Rigoni, M., Peola, S., Castella, B., Foglietta,  
621 M., Griggio, V., Drandi, D., et al. (2011). IGHV unmutated CLL B cells are more prone to  
622 spontaneous apoptosis and subject to environmental prosurvival signals than mutated CLL B  
623 cells. *Leukemia* *25*, 828–837.
- 624 D'Annibale, S., Kim, J., Magliozzi, R., Low, T.Y., Mohammed, S., Heck, A.J.R., and  
625 Guardavaccaro, D. (2014). Proteasome-dependent degradation of transcription factor activating  
626 enhancer-binding protein 4 (TFAP4) controls mitotic division. *J. Biol. Chem.* *289*, 7730–7737.
- 627 El-Athman, R., and Relógio, A. (2018). Escaping circadian regulation: an emerging hallmark of  
628 cancer? *Cell Syst.* *6*, 266–267.
- 629 Furman, R.R., Sharman, J.P., Coutre, S.E., Cheson, B.D., Pagel, J.M., Hillmen, P., Barrientos,  
630 J.C., Zelenetz, A.D., Kipps, T.J., Flinn, I., et al. (2014). Idelalisib and rituximab in relapsed

- 631 chronic lymphocytic leukemia. *N. Engl. J. Med.* *370*, 997–1007.
- 632 Gascoyne, D.M., Long, E., Veiga-Fernandes, H., de Boer, J., Williams, O., Seddon, B., Coles,  
633 M., Kioussis, D., and Brady, H.J.M. (2009). The basic leucine zipper transcription factor E4BP4  
634 is essential for natural killer cell development. *Nat. Immunol.* *10*, 1118–1124.
- 635 Ghamlouch, H., Darwiche, W., Hodroge, A., Ouled-Haddou, H., Dupont, S., Singh, A.R.,  
636 Guignant, C., Trudel, S., Royer, B., Gubler, B., et al. (2015). Factors involved in CLL  
637 pathogenesis and cell survival are disrupted by differentiation of CLL B-cells into  
638 antibody-secreting cells. *Oncotarget* *6*, 18484–18503.
- 639 Griffon, A., Barbier, Q., Dalino, J., van Helden, J., Spicuglia, S., and Ballester, B. (2015).  
640 Integrative analysis of public ChIP-seq experiments reveals a complex multi-cell regulatory  
641 landscape. *Nucleic Acids Res.* *43*, e27.
- 642 Grubert, F., Zaugg, J.B., Kasowski, M., Ursu, O., Spacek, D.V., Martin, A.R., Greenside, P.,  
643 Srivas, R., Phanstiel, D.H., Pekowska, A., et al. (2015). Genetic control of chromatin states in  
644 humans involves local and distal chromosomal interactions. *Cell* *162*, 1051–1065.
- 645 Han, H., Shim, H., Shin, D., Shim, J.E., Ko, Y., Shin, J., Kim, H., Cho, A., Kim, E., Lee, T., et al.  
646 (2015). TRRUST: a reference database of human transcriptional regulatory interactions. *Sci.*  
647 *Rep.* *5*, 11432.
- 648 Han, H., Cho, J.-W., Lee, S., Yun, A., Kim, H., Bae, D., Yang, S., Kim, C.Y., Lee, M., Kim, E., et  
649 al. (2018). TRRUST v2: an expanded reference database of human and mouse transcriptional  
650 regulatory interactions. *Nucleic Acids Res.* *46*, D380–D386.
- 651 Havelange, V., Pekarsky, Y., Nakamura, T., Palamarchuk, A., Alder, H., Rassenti, L., Kipps, T.,  
652 and Croce, C.M. (2011). IRF4 mutations in chronic lymphocytic leukemia. *Blood* *118*,  
653 2827–2829.
- 654 Heckman, C.A., Duan, H., Garcia, P.B., and Boxer, L.M. (2006). Oct transcription factors  
655 mediate t(14;18) lymphoma cell survival by directly regulating bcl-2 expression. *Oncogene* *25*,  
656 888–898.
- 657 Heinz, S., Benner, C., Spann, N., Bertolino, E., Lin, Y.C., Laslo, P., Cheng, J.X., Murre, C.,  
658 Singh, H., and Glass, C.K. (2010). Simple combinations of lineage-determining transcription  
659 factors prime cis-regulatory elements required for macrophage and B cell identities. *Mol. Cell*  
660 *38*, 576–589.
- 661 Kasim, V., Xie, Y.-D., Wang, H.-M., Huang, C., Yan, X.-S., Nian, W.-Q., Zheng, X.-D., Miyagishi,  
662 M., and Wu, S.-R. (2017). Transcription factor Yin Yang 2 is a novel regulator of the p53/p21  
663 axis. *Oncotarget* *8*, 54694–54707.
- 664 Kauffman, E.C., Ricketts, C.J., Rais-Bahrami, S., Yang, Y., Merino, M.J., Bottaro, D.P.,  
665 Srinivasan, R., and Linehan, W.M. (2014). Molecular genetics and cellular features of TFE3 and  
666 TFEB fusion kidney cancers. *Nat. Rev. Urol.* *11*, 465–475.
- 667 Kern, D., Regl, G., Hofbauer, S.W., Altenhofer, P., Achatz, G., Dlugosz, A., Schnidar, H., Greil,  
668 R., Hartmann, T.N., and Aberger, F. (2015). Hedgehog/GLI and PI3K signaling in the initiation

- 669 and maintenance of chronic lymphocytic leukemia. *Oncogene* *34*, 5341–5351.
- 670 Kikushige, Y., Ishikawa, F., Miyamoto, T., Shima, T., Urata, S., Yoshimoto, G., Mori, Y., Iino, T.,  
671 Yamauchi, T., Eto, T., et al. (2011). Self-renewing hematopoietic stem cell is the primary target in  
672 pathogenesis of human chronic lymphocytic leukemia. *Cancer Cell* *20*, 246–259.
- 673 Kim, R., Emi, M., and Tanabe, K. (2007). Cancer immunoediting from immune surveillance to  
674 immune escape. *Immunology* *121*, 1–14.
- 675 Komatsu, M., Kurokawa, H., Waguri, S., Taguchi, K., Kobayashi, A., Ichimura, Y., Sou, Y.-S.,  
676 Ueno, I., Sakamoto, A., Tong, K.I., et al. (2010). The selective autophagy substrate p62  
677 activates the stress responsive transcription factor Nrf2 through inactivation of Keap1. *Nat. Cell*  
678 *Biol.* *12*, 213–223.
- 679 Kreslavsky, T., Vilagos, B., Tagoh, H., Poliakova, D.K., Schwickert, T.A., Wöhner, M., Jaritz, M.,  
680 Weiss, S., Taneja, R., Rossner, M.J., et al. (2017). Essential role for the transcription factor  
681 Bhlhe41 in regulating the development, self-renewal and BCR repertoire of B-1a cells. *Nat.*  
682 *Immunol.* *18*, 442–455.
- 683 Kulakovskiy, I.V., Medvedeva, Y.A., Schaefer, U., Kasianov, A.S., Vorontsov, I.E., Bajic, V.B.,  
684 and Makeev, V.J. (2013). HOCOMOCO: a comprehensive collection of human transcription  
685 factor binding sites models. *Nucleic Acids Res.* *41*, D195-202.
- 686 Landau, D.A., Tausch, E., Taylor-Weiner, A.N., Stewart, C., Reiter, J.G., Bahlo, J., Kluth, S.,  
687 Bozic, I., Lawrence, M., Böttcher, S., et al. (2015). Mutations driving CLL and their evolution in  
688 progression and relapse. *Nature* *526*, 525–530.
- 689 Landt, S.G., Marinov, G.K., Kundaje, A., Kheradpour, P., Pauli, F., Batzoglou, S., Bernstein,  
690 B.E., Bickel, P., Brown, J.B., Cayting, P., et al. (2012). ChIP-seq guidelines and practices of the  
691 ENCODE and modENCODE consortia. *Genome Res.* *22*, 1813–1831.
- 692 Li, Y.J., Sun, L., Shi, Y., Wang, G., Wang, X., Dunn, S.E., Iorio, C., Sreaton, R.A., and Spaner,  
693 D.E. (2017). PPAR-delta promotes survival of chronic lymphocytic leukemia cells in energetically  
694 unfavorable conditions. *Leukemia* *31*, 1905–1914.
- 695 Liu, L., Jin, G., and Zhou, X. (2015). Modeling the relationship of epigenetic modifications to  
696 transcription factor binding. *Nucleic Acids Res.* *43*, 3873–3885.
- 697 Liu, Z., Lee, J., Krummey, S., Lu, W., Cai, H., and Lenardo, M.J. (2011). The kinase LRRK2 is a  
698 regulator of the transcription factor NFAT that modulates the severity of inflammatory bowel  
699 disease. *Nat. Immunol.* *12*, 1063–1070.
- 700 Medina-Rivera, A., Defrance, M., Sand, O., Herrmann, C., Castro-Mondragon, J.A., Delerce, J.,  
701 Jaeger, S., Blanchet, C., Vincens, P., Caron, C., et al. (2015). RSAT 2015: regulatory sequence  
702 analysis tools. *Nucleic Acids Res.* *43*, W50-6.
- 703 Mezger, A., Klemm, S., Mann, I., Brower, K., Mir, A., Bostick, M., Farmer, A., Fordyce, P.,  
704 Linnarsson, S., and Greenleaf, W. (2018). High-throughput chromatin accessibility profiling at  
705 single-cell resolution. *Nat. Commun.* *9*, 3647.
- 706 Minami, Y., Oishi, I., Endo, M., and Nishita, M. (2010). Ror-family receptor tyrosine kinases in



- 707 noncanonical Wnt signaling: their implications in developmental morphogenesis and human  
708 diseases. *Dev. Dyn.* 239, 1–15.
- 709 Mittal, A.K., Chaturvedi, N.K., Rohlfesen, R.A., Gupta, P., Joshi, A.D., Hegde, G.V., Bociek, R.G.,  
710 and Joshi, S.S. (2013). Role of CTLA4 in the proliferation and survival of chronic lymphocytic  
711 leukemia. *PLoS ONE* 8, e70352.
- 712 Neu, K.E., and Wilson, P.C. (2016). Taking the broad view on B cell affinity maturation. *Immunity*  
713 44, 518–520.
- 714 Oakes, C.C., Seifert, M., Assenov, Y., Gu, L., Przekopowicz, M., Ruppert, A.S., Wang, Q.,  
715 Imbusch, C.D., Serva, A., Koser, S.D., et al. (2016). DNA methylation dynamics during B cell  
716 maturation underlie a continuum of disease phenotypes in chronic lymphocytic leukemia. *Nat.*  
717 *Genet.* 48, 253–264.
- 718 Rasmussen, K., Berest, I., Kessler, S., Nishimura, K., Simon-Carrasco, L., Vassilou, G.S.,  
719 Pedersen, M.T., Christensen, J., Zaugg, J., and Helin, K. (2018). TET2 binding to enhancers  
720 facilitates transcription factor recruitment in hematopoietic cells. *BioRxiv*.
- 721 Rendeiro, A.F., Schmidl, C., Strefford, J.C., Walewska, R., Davis, Z., Farlik, M., Oscier, D., and  
722 Bock, C. (2016). Chromatin accessibility maps of chronic lymphocytic leukaemia identify  
723 subtype-specific epigenome signatures and transcription regulatory networks. *Nat. Commun.* 7,  
724 11938.
- 725 Roadmap Epigenomics Consortium, Kundaje, A., Meuleman, W., Ernst, J., Bilenky, M., Yen, A.,  
726 Heravi-Moussavi, A., Kheradpour, P., Zhang, Z., Wang, J., et al. (2015). Integrative analysis of  
727 111 reference human epigenomes. *Nature* 518, 317–330.
- 728 Sands, W.A., Copland, M., and Wheadon, H. (2013). Targeting self-renewal pathways in myeloid  
729 malignancies. *Cell Commun. Signal.* 11, 33.
- 730 Schep, A.N., Wu, B., Buenrostro, J.D., and Greenleaf, W.J. (2017). chromVAR: inferring  
731 transcription-factor-associated accessibility from single-cell epigenomic data. *Nat. Methods* 14,  
732 975–978.
- 733 Slager, S.L., Caporaso, N.E., de Sanjose, S., and Goldin, L.R. (2013). Genetic susceptibility to  
734 chronic lymphocytic leukemia. *Semin. Hematol.* 50, 296–302.
- 735 Sun, J., Ramos, A., Chapman, B., Johnnidis, J.B., Le, L., Ho, Y.-J., Klein, A., Hofmann, O., and  
736 Camargo, F.D. (2014). Clonal dynamics of native haematopoiesis. *Nature* 514, 322–327.
- 737 Teng, M.W.L., Swann, J.B., Koebel, C.M., Schreiber, R.D., and Smyth, M.J. (2008).  
738 Immune-mediated dormancy: an equilibrium with cancer. *J. Leukoc. Biol.* 84, 988–993.
- 739 Whyte, W.A., Orlando, D.A., Hnisz, D., Abraham, B.J., Lin, C.Y., Kagey, M.H., Rahl, P.B., Lee,  
740 T.I., and Young, R.A. (2013). Master transcription factors and mediator establish  
741 super-enhancers at key cell identity genes. *Cell* 153, 307–319.
- 742 Yanai, H., Negishi, H., and Taniguchi, T. (2012). The IRF family of transcription factors:  
743 Inception, impact and implications in oncogenesis. *Oncoimmunology* 1, 1376–1386.

- 744 Yasuda, T., Hayakawa, F., Kurahashi, S., Sugimoto, K., Minami, Y., Tomita, A., and Naoe, T.  
745 (2012). B cell receptor-ERK1/2 signal cancels PAX5-dependent repression of BLIMP1 through  
746 PAX5 phosphorylation: a mechanism of antigen-triggering plasma cell differentiation. *J.*  
747 *Immunol.* 188, 6127–6134.
- 748 Yeomans, A., Thirdborough, S.M., Valle-Argos, B., Linley, A., Krysov, S., Hidalgo, M.S.,  
749 Leonard, E., Ishfaq, M., Wagner, S.D., Willis, A.E., et al. (2016). Engagement of the B-cell  
750 receptor of chronic lymphocytic leukemia cells drives global and MYC-specific mRNA  
751 translation. *Blood* 127, 449–457.
- 752 Zhou, Y., Li, Y.-S., Bandi, S.R., Tang, L., Shinton, S.A., Hayakawa, K., and Hardy, R.R. (2015).  
753 Lin28b promotes fetal B lymphopoiesis through the transcription factor Arid3a. *J. Exp. Med.* 212,  
754 569–580.
